# Supplementary material for: An attraction–repulsion transition of force on wedges induced by active particles
Source: Royal Society of Chemistry journal article supplement (doi:10.1039/c8sm00249e), 2018-01-01
Supplement: c8sm00249e1.pdf [file c8sm00249e1.pdf]

Figure S1

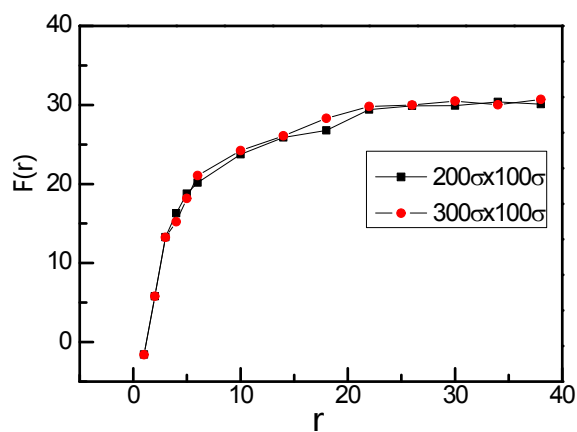

Figure. S1 Effective force  $F(r)$  between two anti-parallel wedges as a function of  $r$  at a particle density of  $\rho = 0.05$  with the apex angle of  $\theta = 90^\circ$  for systems of  $200\sigma \times 100\sigma$  and  $300\sigma \times 100\sigma$ , respectively.
